# Supplementary material for: Utility of a Work Process Classification System for characterizing non-fatal injuries in the Alaskan commercial fishing industry
Source: PubMed Central journal article supplement (PMC4717151; doi:10.3402/ijch.v75.30070), 2016-01-14
Supplement: IJCH-75-30070-s001.pdf [file IJCH-75-30070-s001.pdf]

## SUPPLEMENTARY MATERIAL

| <b>SUPPLEMENTAL TABLE:</b>                                                                 |      |                                                          |           |             |                      |
|--------------------------------------------------------------------------------------------|------|----------------------------------------------------------|-----------|-------------|----------------------|
| Complete Work Process Codes for Non-Fatal Injuries Onboard All Alaskan Fleets, 2006 - 2010 |      |                                                          |           |             |                      |
|                                                                                            |      |                                                          | No.       | %           | Revised or Created * |
| <b>2 Traffic on board</b>                                                                  |      |                                                          | <b>25</b> | <b>18.4</b> |                      |
|                                                                                            | 200  | Embarking/disembarking                                   | 2         |             |                      |
|                                                                                            | 201  | Traffic on deck                                          | 14        |             |                      |
|                                                                                            | 202  | Traffic in cabin/galley/bunk                             | 1         |             |                      |
|                                                                                            | 204  | Traffic in factory                                       | 2         |             |                      |
|                                                                                            | 205  | Traffic in freezer                                       | 2         |             |                      |
|                                                                                            | 206  | Traffic on ladders/stairs                                | 4         |             |                      |
| <b>5 Shooting/setting the gear</b>                                                         |      |                                                          | <b>5</b>  | <b>3.7</b>  |                      |
|                                                                                            | 50   | Pots/traps                                               |           |             |                      |
|                                                                                            | 5000 | Throwing pots                                            | 1         |             |                      |
|                                                                                            | 5003 | Operating pot launcher                                   | 2         |             |                      |
|                                                                                            | 5004 | Untying pots                                             | 1         |             |                      |
|                                                                                            | 59   | Other or non-specified gear type                         |           |             |                      |
|                                                                                            | 5999 | Shooting other or non-specified gear type, non-specified | 1         |             |                      |
| <b>6 Hauling the gear</b>                                                                  |      |                                                          | <b>16</b> | <b>11.7</b> |                      |
|                                                                                            | 60   | Pots/traps                                               |           |             |                      |
|                                                                                            | 6000 | Operating the pot/trap hauler                            | 1         |             |                      |
|                                                                                            | 6008 | Pushing pot to stack                                     | 1         |             | *                    |
|                                                                                            | 6099 | Hauling the pot/trap gear, non-specified                 | 1         |             |                      |
|                                                                                            | 61   | Longliner                                                |           |             |                      |
|                                                                                            | 6100 | Running the longline roller                              | 1         |             |                      |
|                                                                                            | 6103 | Pulling up the flagpole/buoy/anchor                      | 1         |             | *                    |
|                                                                                            | 62   | Stern Trawler                                            |           |             |                      |
|                                                                                            | 6202 | Pulling on slack trawl wire                              | 1         |             |                      |
|                                                                                            | 6203 | Pushing fish from trawl deck into hold                   | 2         |             |                      |
|                                                                                            | 6205 | Pulling up net                                           | 4         |             |                      |
|                                                                                            | 6299 | Hauling the trawl gear, non-specified                    | 1         |             |                      |
|                                                                                            | 65   | Seine                                                    |           |             |                      |
|                                                                                            | 6500 | Hauling seine net into boat                              | 1         |             |                      |
|                                                                                            | 6503 | Skiff operations                                         | 1         |             |                      |
|                                                                                            | 69   | Other or non-specified gear type                         |           |             |                      |
|                                                                                            | 6999 | Hauling other or non-specified gear type, non-specified  | 1         |             |                      |
| <b>7 Handling the gear</b>                                                                 |      |                                                          | <b>10</b> | <b>7.4</b>  |                      |
|                                                                                            | 70   | Pots/traps                                               |           |             |                      |
|                                                                                            | 7000 | Securing gear, non-specified                             | 3         |             |                      |
|                                                                                            | 7004 | Operating crane, non-specified                           | 1         |             |                      |
|                                                                                            | 7007 | Working pot stacks, non-specified                        | 2         |             |                      |
|                                                                                            | 7099 | Handling pot/trap gear on deck, non-specified            | 2         |             |                      |
|                                                                                            | 72   | Stern Trawler                                            |           |             |                      |
|                                                                                            | 7299 | Handling trawl gear on deck, non-specified               | 2         |             |                      |
| <b>8 Processing the catch</b>                                                              |      |                                                          | <b>21</b> | <b>15.4</b> |                      |
|                                                                                            | 800  | Counting and sorting fish /crab                          | 2         |             |                      |
|                                                                                            | 803  | Lifting fish onto table                                  | 1         |             |                      |
|                                                                                            | 804  | Gutting the catch                                        | 1         |             |                      |
|                                                                                            | 805  | Bleeding the fish                                        | 1         |             |                      |
|                                                                                            | 808  | Packing fish in pans                                     | 1         |             |                      |
|                                                                                            | 809  | Heading the catch                                        | 3         |             |                      |
|                                                                                            | 815  | Skinning fish                                            | 1         |             | *                    |
|                                                                                            | 899  | Processing the catch, non-specified                      | 11        |             |                      |
| <b>9 Other work with the catch</b>                                                         |      |                                                          | <b>4</b>  | <b>2.9</b>  |                      |
|                                                                                            | 903  | Offloading fish                                          | 2         |             |                      |
|                                                                                            | 905  | Loading brailer                                          | 1         |             | *                    |
|                                                                                            | 906  | Moving skate roller                                      | 1         |             | *                    |

|                                  |      |                                            |           |             |   |
|----------------------------------|------|--------------------------------------------|-----------|-------------|---|
| <b>10 Handling frozen fish</b>   |      |                                            | <b>25</b> | <b>18.4</b> |   |
|                                  | 1000 | Stacking blocks/bags of fish/crab          | 4         |             |   |
|                                  | 1001 | Cracking pans                              | 1         |             |   |
|                                  | 1002 | Remove fish from conveyor belt             | 1         |             |   |
|                                  | 1004 | In freezer offloading product              | 3         |             |   |
|                                  | 1005 | Bagging/casing blocks of fish/crab         | 1         |             |   |
|                                  | 1007 | Loading plate/blast freezers               | 4         |             |   |
|                                  | 1008 | Unloading plate/blast freezers             | 1         |             |   |
|                                  | 1099 | Handling frozen fish, non-specified        | 10        |             |   |
| <b>12 Working in engine room</b> |      |                                            | <b>2</b>  | <b>1.5</b>  |   |
|                                  | 1200 | Engine maintenance                         | 1         |             |   |
|                                  | 1299 | Working in engine room, non-specified      | 1         |             |   |
| <b>13 Mooring</b>                |      |                                            | <b>3</b>  | <b>2.2</b>  |   |
|                                  | 1300 | Mooring                                    | 2         |             |   |
|                                  | 1301 | Handling lines during mooring              | 1         |             |   |
| <b>15 Off Duty</b>               |      |                                            | <b>6</b>  | <b>4.4</b>  |   |
|                                  | 1500 | Sleeping                                   | 2         |             |   |
|                                  | 1501 | Eating                                     | 2         |             |   |
|                                  | 1502 | Taking shower                              | 1         |             |   |
|                                  | 1504 | In bunk/stateroom                          | 1         |             |   |
| <b>16 Other</b>                  |      |                                            | <b>14</b> | <b>10.3</b> |   |
|                                  | 1601 | General maintenance work                   | 4         |             |   |
|                                  | 1602 | Getting the ship ready for sea             | 1         |             |   |
|                                  | 1606 | Repairing/Maintaining refrigeration system | 1         |             |   |
|                                  | 1608 | Shoveling snow/breaking ice                | 1         |             |   |
|                                  | 1609 | Repairing conveyor motor                   | 1         |             |   |
|                                  | 1613 | Securing/Closing hatch                     | 1         |             |   |
|                                  | 1614 | General vessel repair                      | 1         |             |   |
|                                  | 1615 | Fighting fire                              | 2         |             |   |
|                                  | 1616 | Repairing/Maintaining processing machinery | 2         |             | * |
| <b>17 Diving</b>                 |      |                                            | <b>2</b>  | <b>1.5</b>  |   |
|                                  | 1799 | Diving, non-specified                      | 2         |             |   |
| <b>9999 Unclassifiable</b>       |      |                                            | <b>3</b>  | <b>2.2</b>  |   |
| Total                            |      |                                            | 136       | 100         |   |
